# Supplementary material
Source: ML conference proceedings conference paper supplement (https://openreview.net/forum?id=I8hnAYyvUA)
Supplement: supplementary_material [file attachment]

## A Appendix

This appendix complements the main paper with detailed materials supporting our framework for forecasting student engagement levels. Section A.1 lists the 28 non-cognitive questions and sample responses used to derive qualitative longitudinal features, showcasing the data’s experiential richness. Section A.2 provides an extended discussion of related work, covering prior efforts in LLMs, time-series forecasting, and educational analytics. Section A.3 elaborates on limitations, addressing dataset constraints, imputation dependencies, and computational factors, enhancing transparency and reproducibility.

### A.1 Non-Cognitive Questions and Response Options

Below is the complete list of 28 non-cognitive (NC) questions used to collect weekly student engagement data. Each question includes its prompting rule and response options.

- **Q1:** How much are you looking forward to your CS1 class lecture today?  
**Rule:** Prompted every Monday, Wednesday, and Friday at 12:01 PM (timeout 9240s)  
**Options:**
  1. I am really looking forward to it
  2. I am kind of looking forward to it
  3. I am not really looking forward to it
  4. I am not planning to attend today’s lecture
- **Q2:** How well do you feel you understood the lecture material today?  
**Rule:** Prompted every Monday, Wednesday, and Friday at 3:25 PM on departure from the lecture hall (GPS-based, timeout 9240s)  
**Options:**
  1. I understood all of it well
  2. I understood most of it well
  3. There were some parts I didn’t understand well
  4. There were many parts I couldn’t understand well
- **Q3:** What are the (up to 2) most important reasons for your experience?  
**Rule:** If Q2 response is 1-4 (timeout 9240s)  
**Options:**
  1. The clarity (or lack of it) of the presentation
  2. The interestingness (or lack of it) of the content
  3. The amount that I prepared
  4. Something else
- **Q4:** You answered “Something else”. Would you like to tell us more?  
**Rule:** If Q3 response is 4 (timeout 9240s)  
**Options:**
  1. FillText
- **Q5:** Reflecting on the CS1 class today, which statement best describes your feelings?  
**Rule:** Prompted every Monday, Wednesday, and Friday at 7:00 PM (timeout 9240s)  
**Options:**
  1. I thoroughly enjoyed it
  2. I mostly enjoyed it
  3. I enjoyed it for some parts of it
  4. I did not enjoy the lecture
  5. I was bored at the lecture
  6. I did not attend the lecture
- **Q6:** What are the (up to 2) most important reasons for your response?  
**Rule:** If Q5 response is 1-3 (timeout 9240s)  
**Options:**
  1. I love learning new things
  2. I am doing well in the class
  3. I like to be with my friends in the class
  4. I am not doing well but I like being with my friends
  5. I feel respected in the class
- **Q7:** What are the (up to 2) most important reasons for your response?  
**Rule:** If Q5 response is 4-5 (timeout 9240s)  
**Options:**
  1. I don’t like learning new things
  2. I am not doing well in the class
  3. I don’t like to be around my classmates
  4. I don’t have any friends in the class
  5. My friends don’t go
  6. I don’t feel respected
- **Q8:** Select an answer that best describes your reflection on your CS1 lab.

|     |                                                      |                                                      |     |
|-----|------------------------------------------------------|------------------------------------------------------|-----|
| 091 | <b>Rule:</b> Prompted every Monday on departure      | • <b>Q12:</b> Select up to 3 responses that best de- | 135 |
| 092 | from lab (GPS-based, timeout 9240s)                  | scribe your experience with your instructor in       | 136 |
| 093 | <b>Options:</b>                                      | the last 2 days.                                     | 137 |
| 094 | 1. I was able to complete all tasks                  | <b>Rule:</b> If Q11 response is 1-8 (timeout 9240s)  | 138 |
| 095 | 2. I was able to complete most tasks                 | <b>Options:</b>                                      | 139 |
| 096 | 3. I was unable to complete some tasks               | 1. Instructor knows my name                          | 140 |
| 097 | 4. I was unable to complete most tasks               | 2. Instructor cares about me                         | 141 |
| 098 | 5. I did not go to the lab today                     | 3. Acquainted with instructor                        | 142 |
| 099 | • <b>Q9:</b> What are the (up to 2) most important   | 4. Spoke informally                                  | 143 |
| 100 | reasons for your response?                           | 5. Comfortable asking for help                       | 144 |
| 101 | <b>Rule:</b> If Q8 response is 3-4 (timeout 9240s)   | 6. Not comfortable asking                            | 145 |
| 102 | <b>Options:</b>                                      | 7. Instructor respects opinions                      | 146 |
| 103 | 1. I did not study the relevant topics               | 8. Opinions not respected                            | 147 |
| 104 | 2. I studied but tasks were too difficult            | 9. Didn't feel like talking                          | 148 |
| 105 | 3. I did not seek help from lab assistants           | • <b>Q13:</b> How strongly do you feel you belong at | 149 |
| 106 | 4. I did not get help from lab assistants            | UNL?                                                 | 150 |
| 107 | 5. I did not attend past lectures                    | <b>Rule:</b> Prompted every Tuesday and Thursday     | 151 |
| 108 | 6. I don't have a partner                            | on departure from areas on campus where              | 152 |
| 109 | • <b>Q10:</b> What are the (up to 3) most important  | students usually gather outside of their classes     | 153 |
| 110 | reasons for your response?                           | or labs (GPS-based, timeout 9240s)                   | 154 |
| 111 | <b>Rule:</b> If Q8 response is 5 (timeout 9240s)     | <b>Options:</b>                                      | 155 |
| 112 | <b>Options:</b>                                      | 1. Really belong                                     | 156 |
| 113 | 1. Physically unwell                                 | 2. Bit like I belong                                 | 157 |
| 114 | 2. Don't like being in lab                           | 3. Could belong                                      | 158 |
| 115 | 3. Didn't study relevant topics                      | 4. Little out of place                               | 159 |
| 116 | 4. Don't get help from assistants                    | 5. Don't belong                                      | 160 |
| 117 | 5. Did not attend past lectures                      | • <b>Q14:</b> How strongly do you feel you belong in | 161 |
| 118 | 6. No partners                                       | the CS1 class?                                       | 162 |
| 119 | 7. Can do tasks alone                                | <b>Rule:</b> If Q13 response is 1-5 (timeout 9240s)  | 163 |
| 120 | 8. Attended another day                              | <b>Options:</b>                                      | 164 |
| 121 | • <b>Q11:</b> Select up to 3 responses that best de- | 1. Really belong                                     | 165 |
| 122 | scribe your experience with classmates in the        | 2. Bit like I belong                                 | 166 |
| 123 | last 2 days.                                         | 3. Could belong                                      | 167 |
| 124 | <b>Rule:</b> Prompted every Tuesday and Thursday     | 4. Little out of place                               | 168 |
| 125 | at 12:01 PM (timeout 9240s)                          | 5. Don't belong                                      | 169 |
| 126 | <b>Options:</b>                                      | • <b>Q15:</b> What strategy do you typically use for | 170 |
| 127 | 1. Learned something new                             | solving assignments and lab problems? (Up            | 171 |
| 128 | 2. Students near me work well together               | to 3)                                                | 172 |
| 129 | 3. Learned something personal                        | <b>Rule:</b> Prompted every Tuesday and Thursday     | 173 |
| 130 | 4. Comfortable asking for help                       | at 7:00 PM (timeout 9240s)                           | 174 |
| 131 | 5. Classmates respect my opinions                    | <b>Options:</b>                                      | 175 |
| 132 | 6. Opinions not respected                            | 1. Use concepts from lectures/labs                   | 176 |
| 133 | 7. Didn't feel like talking                          | 2. Categorize problems                               | 177 |
| 134 | 8. Worked by myself                                  | 3. Solve without prior context                       | 178 |
|     |                                                      | 4. Ask friends                                       | 179 |

|     |                                                                         |                                                                               |     |
|-----|-------------------------------------------------------------------------|-------------------------------------------------------------------------------|-----|
| 180 | 5. Search online                                                        | 3. Somewhat confident                                                         | 224 |
| 181 | • <b>Q16:</b> Which statement best describes your experience? (Up to 2) | 4. Little confident                                                           | 225 |
| 182 | <b>Rule:</b> If Q15 response is 1-5 (timeout 9240s)                     | 5. Not confident                                                              | 226 |
| 183 | <b>Options:</b>                                                         | • <b>Q21:</b> How satisfied are you with your performance in this class?      | 227 |
| 184 | 1. Attempt extra problems                                               | <b>Rule:</b> Prompted every Saturday at 7:00 PM (timeout 9240s)               | 228 |
| 185 | 2. Ask instructor for more                                              | <b>Options:</b>                                                               | 229 |
| 186 | 3. Only required problems                                               | 1. Very satisfied                                                             | 230 |
| 187 | 4. Feel anxious                                                         | 2. Satisfied                                                                  | 231 |
| 188 | 5. Struggle with required problems                                      | 3. Somewhat satisfied                                                         | 232 |
| 189 |                                                                         | 4. Little satisfied                                                           | 233 |
| 190 | • <b>Q17:</b> What are the (up to 2) most important reasons?            | 5. Not satisfied                                                              | 234 |
| 191 | <b>Rule:</b> If Q16 response is 1-2 (timeout 9240s)                     |                                                                               | 235 |
| 192 | <b>Options:</b>                                                         | • <b>Q22:</b> How do you think other students are performing compared to you? | 236 |
| 193 | 1. Love challenging problems                                            | <b>Rule:</b> If Q21 response is 1-5 (timeout 9240s)                           | 237 |
| 194 | 2. Increase grade                                                       | <b>Options:</b>                                                               | 238 |
| 195 | 3. Be ahead                                                             | 1. Much better                                                                | 239 |
| 196 | 4. Impress instructor                                                   | 2. Little better                                                              | 240 |
| 197 | 5. Impress friends                                                      | 3. I'm a little better                                                        | 241 |
| 198 |                                                                         | 4. I'm much better                                                            | 242 |
| 199 | • <b>Q18:</b> What grade do you think you might earn in CS1?            | • <b>Q23:</b> How worried are you about your performance?                     | 243 |
| 200 | <b>Rule:</b> Prompted every Saturday at 12:01 PM (timeout 9240s)        | <b>Rule:</b> If Q22 response is 1-4 (timeout 9240s)                           | 244 |
| 201 | <b>Options:</b>                                                         | <b>Options:</b>                                                               | 245 |
| 202 | 1. A                                                                    | 1. Not at all                                                                 | 246 |
| 203 | 2. B                                                                    | 2. Little                                                                     | 247 |
| 204 | 3. C                                                                    | 3. Somewhat                                                                   | 248 |
| 205 | 4. D                                                                    | 4. Worried                                                                    | 249 |
| 206 | 5. Not pass                                                             | 5. Very worried                                                               | 250 |
| 207 |                                                                         | • <b>Q24:</b> How much do you see yourself as a future engineer or scientist? | 251 |
| 208 | • <b>Q19:</b> How confident are you in completing CS1 requirements?     | <b>Rule:</b> Prompted every Sunday at 12:01 PM (timeout 9240s)                | 252 |
| 209 | <b>Rule:</b> If Q18 response is 1-5 (timeout 9240s)                     | <b>Options:</b>                                                               | 253 |
| 210 | <b>Options:</b>                                                         | 1. Well suited                                                                | 254 |
| 211 | 1. Very confident                                                       | 2. Like but unsure                                                            | 255 |
| 212 | 2. Confident                                                            | 3. Want to like but doubt                                                     | 256 |
| 213 | 3. Somewhat confident                                                   | 4. Not for me                                                                 | 257 |
| 214 | 4. Little confident                                                     | • <b>Q25:</b> How much do others see you as a future engineer/scientist?      | 258 |
| 215 | 5. Not confident                                                        | <b>Rule:</b> If Q24 response is 1-4 (timeout 9240s)                           | 259 |
| 216 |                                                                         | <b>Options:</b>                                                               | 260 |
| 217 | • <b>Q20:</b> How confident are you in excelling in CS1?                | 1. Very much                                                                  | 261 |
| 218 | <b>Rule:</b> If Q19 response is 1-5 (timeout 9240s)                     |                                                                               | 262 |
| 219 | <b>Options:</b>                                                         |                                                                               | 263 |
| 220 | 1. Very confident                                                       |                                                                               | 264 |
| 221 | 2. Confident                                                            |                                                                               | 265 |
| 222 |                                                                         |                                                                               | 266 |
| 223 |                                                                         |                                                                               | 267 |

- 268 2. A lot
- 269 3. Somewhat
- 270 4. A little
- 271 5. Not at all
- 272 • **Q26:** How important is CS1 for your future
- 273 career?
- 274 **Rule:** If Q25 response is 1-5 (timeout 9240s)
- 275 **Options:**
- 276 1. Very important
- 277 2. Important
- 278 3. Somewhat important
- 279 4. Little important
- 280 5. Not important
- 281 • **Q27:** How important is doing well in college
- 282 classes for a good life?
- 283 **Rule:** If Q26 response is 1-5 (timeout 9240s)
- 284 **Options:**
- 285 1. Very important
- 286 2. Important
- 287 3. Somewhat important
- 288 4. Little important
- 289 5. Not important
- 290 • **Q28:** What type of on-campus extracurricular
- 291 activities are you involved in?
- 292 **Rule:** Prompted every Sunday at 7:00 PM
- 293 (timeout 9240s)
- 294 **Options:**
- 295 1. Fraternity/sorority
- 296 2. Social club
- 297 3. Sports team
- 298 4. None

## 299 A.2 Related Work

300 This research sits at the intersection of LLMs, time-  
 301 series forecasting, and educational analytics, with  
 302 a particular focus on handling missing data and fea-  
 303 ture selection in LE sequences. Below, we review  
 304 prior work in these areas, highlighting gaps that  
 305 our LLM-based framework addresses.

### 306 LLMs for Time-Series and Sequential Data.

307 Transformer-based LLMs have revolutionized NLP,  
 308 excelling in tasks like text generation and classifica-  
 309 tion (Bommasani et al., 2021). Recent efforts have  
 310 extended their application to sequential data be-  
 311 yond text, such as time-series forecasting. Models

like TimeGPT (Garza et al., 2024) and Prompt-  
 Cast (Xue and Salim, 2024) leverage LLMs’ se-  
 quence modeling capabilities to predict numeric  
 trends, often by verbalizing time-series into textual  
 prompts. Research in this domain can be broadly  
 categorized into model-centric and data-centric ap-  
 proaches (Sun et al., 2023).

*Data-centric* methods emphasize transforming  
 time-series into representations suitable for pre-  
 trained LMs, using embedding techniques to align  
 time-series tokens with LM text spaces (Sun et al.,  
 2023), augmenting embeddings with prompts con-  
 taining dataset context or task instructions (Jin  
 et al., 2024), two-stage fine-tuning (Chang et al.,  
 2023), and zero-shot preprocessing of numeric  
 data (Gruver et al., 2023). *Model-centric* ap-  
 proaches adapt LMs to time-series by fine-tuning  
 specific layers (e.g., embedding, normalization)  
 while freezing others (?), incorporating designs  
 like time-series decomposition and soft prompts  
 (Cao et al., 2023), framing forecasting as question-  
 answering (Xue and Salim, 2024), or using prompt-  
 tuning with few-shot learning (Liu et al., 2023).

While we adopt a model-centric approach by  
 fine-tuning LLMs for forecasting, our work di-  
 verges by targeting experiential, qualitative LE  
 data rather than numeric time-series. Unlike soft-  
 prompt methods (Cao et al., 2023), we employ  
 discrete prompts, and our focus on subjective en-  
 gagement attributes in education addresses a do-  
 main where temporal dependencies and missing-  
 ness remain underexplored by existing LLM-based  
 time-series models.

**Student Engagement Forecasting in Educa-  
 tional Analytics.** Educational data mining has  
 long explored student engagement through longi-  
 tudinal data, often using cognitive metrics (e.g.,  
 grades) or behavioral logs (e.g., clickstreams)  
 (Wang et al., 2014; Li et al., 2020). Machine learn-  
 ing methods like LSTMs and random forests have  
 been applied to predict engagement or performance  
 (Xu and Ouyang, 2022), but they typically rely on  
 numeric features and struggle with the subjective,  
 textual responses prevalent in LE data. Recent  
 studies have incorporated non-cognitive (NC) fac-  
 tors—such as self-efficacy and motivation—using  
 survey-based datasets (Fredricks, 2014; Sinatra  
 et al., 2015), yet these efforts rarely address tem-  
 poral dynamics or missingness systematically. Our  
 approach differs by focusing on weekly NC tra-  
 jectories, verbalizing them for LLM processing,

and forecasting binary engagement shifts, offering a novel bridge between educational analytics and NLP.

### Imputing Missing Data in LE Sequences.

Missing data is a pervasive challenge in longitudinal studies, with implications for model accuracy and generalizability. Rubin’s taxonomy classifies missingness as missing completely at random (MCAR), missing at random (MAR), or missing not at random (MNAR), with MNAR being particularly problematic due to its correlation with unobserved factors (e.g., disengagement) (Rubin, 1976). Traditional statistical methods, such as multiple imputation by chained equations (MICE) (van Buuren and Groothuis-Oudshoorn, 2011) and fully conditional specification (Van Buuren et al., 2006), estimate missing values based on observed data distributions. However, these approaches assume MCAR or MAR, require complete training sets, and struggle with LE data’s qualitative heterogeneity and MNAR patterns, such as students skipping questions due to disinterest (Muzellec et al., 2020).

Machine learning has advanced imputation with generative models. GAIN (Yoon et al., 2018) uses Generative Adversarial Networks (GANs) to impute numeric values, while MIWAE (Mattei and Frellsen, 2019) extends importance-weighted autoencoders for MAR data. Transformed Distribution Matching (TDM) (Zhao et al., 2023) aligns incomplete batches distributionally, excelling across missingness types. These methods, however, falter with LE sequences’ textual NC features and MNAR missingness, where context-aware solutions are needed. Techniques like LOCF (Liu, 2016) are inadequate, ignoring behavioral causes of missingness. Transformer-based approaches like TabMT (Gulati and Roysdon, 2023) and LLM pre-training on tables (Yang et al., 2024) show promise but overlook LE-specific patterns. Our LLM-informed imputation uses GPT-4o to generate textual descriptors, capturing MNAR context without numeric estimation.

**Feature Selection for Qualitative High-Dimensional Data.** Feature selection—identifying the most relevant features from high-dimensional datasets—is critical for enhancing model performance, reducing computational complexity, and improving interpretability (Guyon and Elisseeff, 2003). In domains like LE data, with its rich, qualitative NC attributes, effective feature selection is paramount yet challenging. Traditional

methods include statistical techniques like variance thresholding and correlation-based selection (Jain et al., 2000), alongside machine learning approaches such as feature importance from tree-based models (e.g., random forests) and regularization (e.g., LASSO) (Hastie et al., 2009). Recently, deep learning has introduced automated feature selection via attention mechanisms and feature masking, learning relevance within neural architectures (Ying et al., 2024; Cherepanova et al., 2023).

These methods, however, often rely on statistical or linear assumptions, which may fail to capture the nuanced, non-linear, and semantically driven relationships in qualitative LE data (e.g., self-reported engagement). For instance, correlation-based selection might overlook features with subtle contextual importance, while deep learning approaches typically require large, labeled datasets—scarce in educational settings. We propose a novel zero-shot feature selection approach using GPT-4o, leveraging its advanced reasoning and world knowledge to assess the semantic relevance of NC features for predicting student engagement. Unlike traditional and deep learning methods, our LLM-based strategy excels in high-dimensional, textual data, offering a scalable, context-aware alternative that aligns with LE data’s subjective nature and enhances downstream forecasting.

While prior studies apply LLMs to time-series, impute missing values, or select features in structured data, none address the combined challenges of qualitative LE sequences, MNAR missingness, and engagement forecasting in education. Our three-tier framework—imputation, zero-shot feature selection, and fine-tuned forecasting—extends NLP techniques to this domain, emphasizing LLM-based feature selection as a key innovation, and outperforms traditional and generative baselines by embracing LE data’s textual richness.

### A.3 Limitations

While our LLM-based framework demonstrates the promise of LLMs in forecasting student engagement levels from qualitative longitudinal data, several limitations warrant consideration. First, our dataset, comprising 960 trajectories from students within a single university’s introductory programming courses, is modest in size compared to typical NLP corpora. This scale might limit the robustness and the generalizability of our findings to diverse academic disciplines or educational set-



|     |                                                                                                                                                                                                                                                                                                                                                                                                                                                                                    |     |
|-----|------------------------------------------------------------------------------------------------------------------------------------------------------------------------------------------------------------------------------------------------------------------------------------------------------------------------------------------------------------------------------------------------------------------------------------------------------------------------------------|-----|
| 573 | Manbir S Gulati and Paul F Roysdon. 2023. <a href="#">Tabmt: Generating tabular data with masked transformers</a> . <i>Preprint</i> , arXiv:2312.06089.                                                                                                                                                                                                                                                                                                                            | 626 |
| 574 |                                                                                                                                                                                                                                                                                                                                                                                                                                                                                    | 627 |
| 575 |                                                                                                                                                                                                                                                                                                                                                                                                                                                                                    | 628 |
| 576 | Isabelle Guyon and André Elisseeff. 2003. An introduction to variable and feature selection. <i>J. Mach. Learn. Res.</i> , 3(null):1157–1182.                                                                                                                                                                                                                                                                                                                                      | 629 |
| 577 |                                                                                                                                                                                                                                                                                                                                                                                                                                                                                    |     |
| 578 |                                                                                                                                                                                                                                                                                                                                                                                                                                                                                    |     |
| 579 | Trevor Hastie, Robert Tibshirani, and Jerome Friedman. 2009. <i>The Elements of Statistical Learning: Data Mining, Inference, and Prediction</i> , 2nd edition. Springer.                                                                                                                                                                                                                                                                                                          | 630 |
| 580 |                                                                                                                                                                                                                                                                                                                                                                                                                                                                                    | 631 |
| 581 |                                                                                                                                                                                                                                                                                                                                                                                                                                                                                    | 632 |
| 582 |                                                                                                                                                                                                                                                                                                                                                                                                                                                                                    |     |
| 583 | A.K. Jain, R.P.W. Duin, and Jianchang Mao. 2000. <a href="#">Statistical pattern recognition: a review</a> . <i>IEEE Transactions on Pattern Analysis and Machine Intelligence</i> , 22(1):4–37.                                                                                                                                                                                                                                                                                   | 633 |
| 584 |                                                                                                                                                                                                                                                                                                                                                                                                                                                                                    | 634 |
| 585 |                                                                                                                                                                                                                                                                                                                                                                                                                                                                                    | 635 |
| 586 |                                                                                                                                                                                                                                                                                                                                                                                                                                                                                    | 636 |
| 587 | Ming Jin, Shiyu Wang, Lintao Ma, Zhixuan Chu, James Y. Zhang, Xiaoming Shi, Pin-Yu Chen, Yuxuan Liang, Yuan-Fang Li, Shirui Pan, and Qingsong Wen. 2024. <a href="#">Time-LLM: Time series forecasting by reprogramming large language models</a> . In <i>Proceedings of the International Conference on Learning Representations (ICLR)</i> .                                                                                                                                     | 637 |
| 588 |                                                                                                                                                                                                                                                                                                                                                                                                                                                                                    | 638 |
| 589 |                                                                                                                                                                                                                                                                                                                                                                                                                                                                                    | 639 |
| 590 |                                                                                                                                                                                                                                                                                                                                                                                                                                                                                    | 640 |
| 591 |                                                                                                                                                                                                                                                                                                                                                                                                                                                                                    | 641 |
| 592 |                                                                                                                                                                                                                                                                                                                                                                                                                                                                                    | 642 |
| 593 |                                                                                                                                                                                                                                                                                                                                                                                                                                                                                    | 643 |
| 594 | Xiang Li, Xinning Zhu, Xiaoying Zhu, Yang Ji, and Xiaosheng Tang. 2020. <a href="#">Student Academic Performance Prediction Using Deep Multi-source Behavior Sequential Network</a> . In <i>Advances in Knowledge Discovery and Data Mining</i> , Lecture Notes in Computer Science, pages 567–579, Cham. Springer International Publishing.                                                                                                                                       | 644 |
| 595 |                                                                                                                                                                                                                                                                                                                                                                                                                                                                                    | 645 |
| 596 |                                                                                                                                                                                                                                                                                                                                                                                                                                                                                    | 646 |
| 597 |                                                                                                                                                                                                                                                                                                                                                                                                                                                                                    | 647 |
| 598 |                                                                                                                                                                                                                                                                                                                                                                                                                                                                                    | 648 |
| 599 |                                                                                                                                                                                                                                                                                                                                                                                                                                                                                    | 649 |
| 600 |                                                                                                                                                                                                                                                                                                                                                                                                                                                                                    | 650 |
| 601 | Xian Liu. 2016. Methods for handling missing data. In Xian Liu, editor, <i>Methods and Applications of Longitudinal Data Analysis</i> , chapter 14, pages 441–473. Academic Press.                                                                                                                                                                                                                                                                                                 | 651 |
| 602 |                                                                                                                                                                                                                                                                                                                                                                                                                                                                                    | 652 |
| 603 |                                                                                                                                                                                                                                                                                                                                                                                                                                                                                    | 653 |
| 604 |                                                                                                                                                                                                                                                                                                                                                                                                                                                                                    | 654 |
| 605 | Xin Liu, Daniel McDuff, Geza Kovacs, Isaac Galatzer-Levy, Jacob Sunshine, Jiening Zhan, Ming-Zher Poh, Shun Liao, Paolo Di Achille, and Shwetak Patel. 2023. <a href="#">Large language models are few-shot health learners</a> . <i>Preprint</i> , arXiv:2305.15525.                                                                                                                                                                                                              | 655 |
| 606 |                                                                                                                                                                                                                                                                                                                                                                                                                                                                                    | 656 |
| 607 |                                                                                                                                                                                                                                                                                                                                                                                                                                                                                    | 657 |
| 608 |                                                                                                                                                                                                                                                                                                                                                                                                                                                                                    | 658 |
| 609 |                                                                                                                                                                                                                                                                                                                                                                                                                                                                                    | 659 |
| 610 | Pierre-Alexandre Mattei and Jes Frellsen. 2019. Miwae: Deep generative modelling and imputation of incomplete data sets. In <i>Proceedings of the International Conference on Machine Learning</i> , pages 4413–4423. PMLR.                                                                                                                                                                                                                                                        | 660 |
| 611 |                                                                                                                                                                                                                                                                                                                                                                                                                                                                                    | 661 |
| 612 |                                                                                                                                                                                                                                                                                                                                                                                                                                                                                    | 662 |
| 613 |                                                                                                                                                                                                                                                                                                                                                                                                                                                                                    | 663 |
| 614 |                                                                                                                                                                                                                                                                                                                                                                                                                                                                                    | 664 |
| 615 | Boris Muzellec, Julie Josse, Claire Boyer, and Marco Cuturi. 2020. Missing data imputation using optimal transport. In <i>Proceedings of the 37th International Conference on Machine Learning, ICML’20</i> . JMLR.org.                                                                                                                                                                                                                                                            | 665 |
| 616 |                                                                                                                                                                                                                                                                                                                                                                                                                                                                                    | 666 |
| 617 |                                                                                                                                                                                                                                                                                                                                                                                                                                                                                    | 667 |
| 618 |                                                                                                                                                                                                                                                                                                                                                                                                                                                                                    | 668 |
| 619 |                                                                                                                                                                                                                                                                                                                                                                                                                                                                                    | 669 |
| 620 | D. B. Rubin. 1976. <a href="#">Inference and missing data</a> . <i>Biometrika</i> , 63:581–592.                                                                                                                                                                                                                                                                                                                                                                                    | 670 |
| 621 |                                                                                                                                                                                                                                                                                                                                                                                                                                                                                    | 671 |
| 622 | Gale M. Sinatra, Benjamin C. Heddy, and Doug Lombardi. 2015. The challenges of defining and measuring student engagement in science. <i>Educational Psychologist</i> , 50(1):1–13.                                                                                                                                                                                                                                                                                                 |     |
| 623 |                                                                                                                                                                                                                                                                                                                                                                                                                                                                                    |     |
| 624 |                                                                                                                                                                                                                                                                                                                                                                                                                                                                                    |     |
| 625 |                                                                                                                                                                                                                                                                                                                                                                                                                                                                                    |     |
|     | Chenxi Sun, Yaliang Li, Hongyan Li, and Shenda Hong. 2023. <a href="#">Test: Text prototype aligned embedding to activate llm’s ability for time series</a> . <i>Preprint</i> , arXiv:2308.08241.                                                                                                                                                                                                                                                                                  |     |
|     | S. van Buuren and K. Groothuis-Oudshoorn. 2011. mice: Multivariate imputation by chained equations in r. <i>Journal of Statistical Software</i> , 45(3):1–67.                                                                                                                                                                                                                                                                                                                      |     |
|     | Stef Van Buuren, Jean-Paul Brand, Karin Groothuis-Oudshoorn, and Donald B. Rubin. 2006. Fully conditional specification in multivariate imputation. <i>Journal of Statistical Computation and Simulation</i> , 76(12):1049–1064.                                                                                                                                                                                                                                                   |     |
|     | Rui Wang, Fanglin Chen, Zhenyu Chen, Tianxing Li, Gabriella Harari, Stefanie Tignor, Xia Zhou, Dror Ben-Zeev, and Andrew T. Campbell. 2014. <a href="#">StudentLife: assessing mental health, academic performance and behavioral trends of college students using smartphones</a> . In <i>Proceedings of the 2014 ACM International Joint Conference on Pervasive and Ubiquitous Computing, UbiComp ’14</i> , pages 3–14, New York, NY, USA. Association for Computing Machinery. |     |
|     | WeiQi Xu and Fan Ouyang. 2022. <a href="#">The application of AI technologies in STEM education: a systematic review from 2011 to 2021</a> . <i>International Journal of STEM Education</i> , 9(1):59.                                                                                                                                                                                                                                                                             |     |
|     | Hao Xue and Flora D. Salim. 2024. <a href="#">Promptcast: A new prompt-based learning paradigm for time series forecasting</a> . <i>IEEE Trans. on Knowl. and Data Eng.</i> , 36(11):6851–6864.                                                                                                                                                                                                                                                                                    |     |
|     | Yazheng Yang, Yuqi Wang, Sankalok Sen, Lei Li, and Qi Liu. 2024. <a href="#">Unleashing the potential of large language models for predictive tabular tasks in data science</a> . <i>Preprint</i> , arXiv:2403.20208.                                                                                                                                                                                                                                                              |     |
|     | Wangyang Ying, Dongjie Wang, Haifeng Chen, and Yanjie Fu. 2024. <a href="#">Feature selection as deep sequential generative learning</a> . <i>Preprint</i> , arXiv:2403.03838.                                                                                                                                                                                                                                                                                                     |     |
|     | Jinsung Yoon, James Jordon, and Mihaela van der Schaar. 2018. <a href="#">Gain: Missing data imputation using generative adversarial nets</a> . In <i>Proceedings of the 35th International Conference on Machine Learning</i> , volume 80, pages 5689–5698. PMLR.                                                                                                                                                                                                                 |     |
|     | He Zhao, Ke Sun, Amir Dezfouli, and Edwin V Bonilla. 2023. <a href="#">Transformed distribution matching for missing value imputation</a> . In <i>International Conference on Machine Learning</i> , pages 42159–42186. PMLR.                                                                                                                                                                                                                                                      |     |
